# Supplementary material
Source: HighWire-hosted journal article supplement (https://bmjopen.bmj.com/content/9/11/e025588)
Supplement: inline-supplementary-material-1 [file inline-supplementary-material-1.pdf]

**Survey for paramedics involved in PARAMEDIC-2 adrenaline trial**

- 1. How long have you been qualified as a paramedic?**
- 2. What grade of paramedic are you?**
  - ☐ Paramedic
  - ☐ Senior Paramedic
  - ☐ Advanced Paramedic Practitioner
  - ☐ Other (please specify below)
- 3. Why did you get involved in the PARAMEDIC-2 adrenaline trial?**
- 4. Did you enroll a patient into the PARAMEDIC-2 trial?**
  - ☐ Yes – I enrolled one or more patients myself
  - ☐ No – but I was involved in a resuscitation(s) where the patient was enrolled
  - ☐ No – I did not enroll any patients
- 5. Did you think the method of PARAMEDIC-2 training (DVD and multiple-choice assessment) was effective?**
  - ☐ Yes
  - ☐ No

Please provide reasons for your answer below:

- 6. Is there anything you would have changed about the trial's training?**
  - ☐ Yes
  - ☐ No

If yes, please specify what you would have changed and why:

- 7. Would you have completed the trial training if the incentive payment had not been offered?**
  - ☐ Yes
  - ☐ No
  - ☐ I did not receive the payment (e.g. bank staff)

Please provide reasons for your answer below:

8. Were there any barriers you experienced to recruiting patients? If so, please describe them:
9. Did you have any particularly positive experiences of taking part in the study? If so, please describe them:
10. Did you have any particularly negative experiences of taking part in the study? If so, please describe them:
11. Overall, would you say your experience of being involved in this trial was positive or negative?
- ☐ Positive
  - ☐ Negative
  - ☐ Don't know
- Please provide reasons for your answer:
12. Were you aware of the wider publicity/controversy surrounding the PARAMEDIC-2 adrenaline trial?
- ☐ Yes
  - ☐ No
13. If you answered "yes" to Q12, did it make you:
- ☐ More willing to participate
  - ☐ Less willing to participate
  - ☐ No difference in willingness to participate
- Please provide reasons for your answer:
14. During recruitment of trial patient(s), at any time did you explain their enrolment to relatives or friends on scene?
- ☐ Yes
  - ☐ No
  - ☐ I was not involved in any trial recruitments
15. If you answered "yes" to Q14, was this because: (please tick all that apply)
- ☐ Relative/friend on scene enquired about the trial
  - ☐ Relative/friend on scene overheard clinicians speaking about the trial
  - ☐ I chose to explain the trial to them
  - ☐ Other (please specify below)

**16. How did you feel about enrolling patients into the PARAMEDIC-2 trial without their consent?**

- ☐ Comfortable
- ☐ Uncomfortable
- ☐ Indifferent

Please explain your answer:

**17. Is there anything you would change about the way the study was run, from your perspective as participating paramedic? If so, what?****18. How important do you think it is for ambulance services to conduct research?**

- ☐ Very important
- ☐ Slightly important
- ☐ Not really that important
- ☐ Not important at all
- ☐ Don't know

Please explain your answer:

**19. How likely would you be to get involved in other pre-hospital research in the future?**

- ☐ Very likely
- ☐ A little likely
- ☐ Not that likely
- ☐ Not at all likely
- ☐ Don't know

**20. What might encourage you to take part in future research?****21. Do you have any other comments about being involved in this study?**
